# Supplementary material for: Long-Term Evolution in Noctilucent Clouds’ Response to the Solar Cycle: A Model-Based Study
Source: MDPI journal article supplement (doi:10.3390/atmos15010088), 2024-01-09
Supplement: s1 [file s1]

# Long-Term Evolution in Noctilucent Clouds' Response to the Solar Cycle: A Model-Based Study

Ashique Vellalassery \*, Gerd Baumgarten, Mykhaylo Grygalashvyly and Franz-Josef Lübken

**Table S1.** A table presenting the definitions of technical terms used in the article.

| Technical term                                  |  | Definition                                                                                                                                                                                                                                                                                                                                   |
|-------------------------------------------------|--|----------------------------------------------------------------------------------------------------------------------------------------------------------------------------------------------------------------------------------------------------------------------------------------------------------------------------------------------|
| NLC brightness ( $\beta$ )                      |  | Backscatter coefficient at a wavelength of 532 nm ( $\beta$ in units of $10^{-10}/(\text{m}\cdot\text{sr})$ ). Defined as the cross-section per unit volume and per unit solid angle for photons being scattered in the backward direction.                                                                                                  |
| Maximum NLC brightness ( $\beta_{\text{max}}$ ) |  | Maximum backscatter coefficient at a wavelength of 532 nm ( $\beta_{\text{max}}$ )                                                                                                                                                                                                                                                           |
| Brightness threshold ( $\beta_{\text{lim}}$ )   |  | Some observations detect NLC only above a certain brightness threshold, only NLC above a given threshold ( $\beta > \beta_{\text{lim}}$ ) are considered when averaging. $\beta_{\text{lim}}$ is set to 0.05, considering even small NLC events while excluding non-NLC events.                                                              |
| NLC altitude or $\beta_{\text{max}}$ altitude   |  | The altitude of maximum NLC brightness ( $\beta_{\text{max}}$ altitude)                                                                                                                                                                                                                                                                      |
| Degree of water vapour supersaturation ( $S$ )  |  | The saturation ratio of air with water vapour is defined as $S = PH_2O/P_{\text{ice}}$ , where $PH_2O$ is the $H_2O$ partial pressure ( $CH_2O \cdot P$ ), and $P_{\text{ice}}$ is the saturation vapour pressure over a plane ice surface ( $CH_2O$ is the water vapour mixing ratio). An environment with value $S > 1$ is supersaturated. |
| Maximum number of events ( $N_{\text{max}}$ )   |  | The maximum number of events per year is $N_{\text{max}} = 89,280$ given by the number of latitudes within each range (6), longitudes (120), days (31), and time slots per day (4).                                                                                                                                                          |
| NLC event                                       |  | Whenever an ice layer occurs in a given latitude/longitude bin and time segment in MIMAS.                                                                                                                                                                                                                                                    |
| Pressure altitude ( $z_p$ )                     |  | Pressure altitude, $z_p$ , is given by $z_p = H \cdot \ln(p_0/p_{\text{mean}})$ where $p_0 = 1013 \text{ hPa}$ (sea surface pressure), $p$ pressure at certain level, and $H = 7000 \text{ m}$ (scale height).                                                                                                                               |
| NLC Sublimation                                 |  | Direct transition of NLC ice particle from a solid to a gas without passing through the liquid phase.                                                                                                                                                                                                                                        |
| Frost point temperature                         |  | Temperature at which air becomes saturated with water vapour ( $S > 1$ ), leading to the formation of ice particle.                                                                                                                                                                                                                          |
| Ice water content (IWC)                         |  | The amount of ice in a column (in units of $\text{g}/\text{km}^2$ )                                                                                                                                                                                                                                                                          |

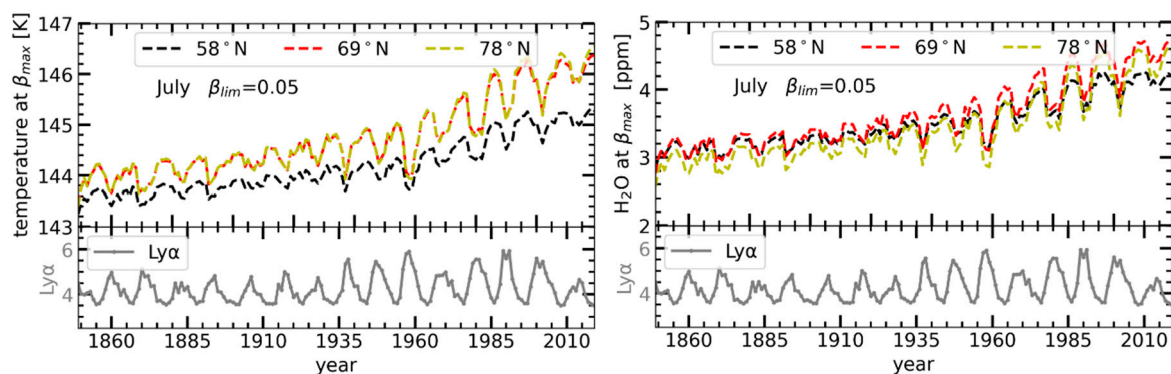

**Figure S1.** Time series of background temperature and  $H_2O$  at the maximum brightness altitude for three different latitudes ( $58^\circ\text{N}$ ,  $69^\circ\text{N}$ , and  $78^\circ\text{N}$ ) spanning the years 1849 to 2100.

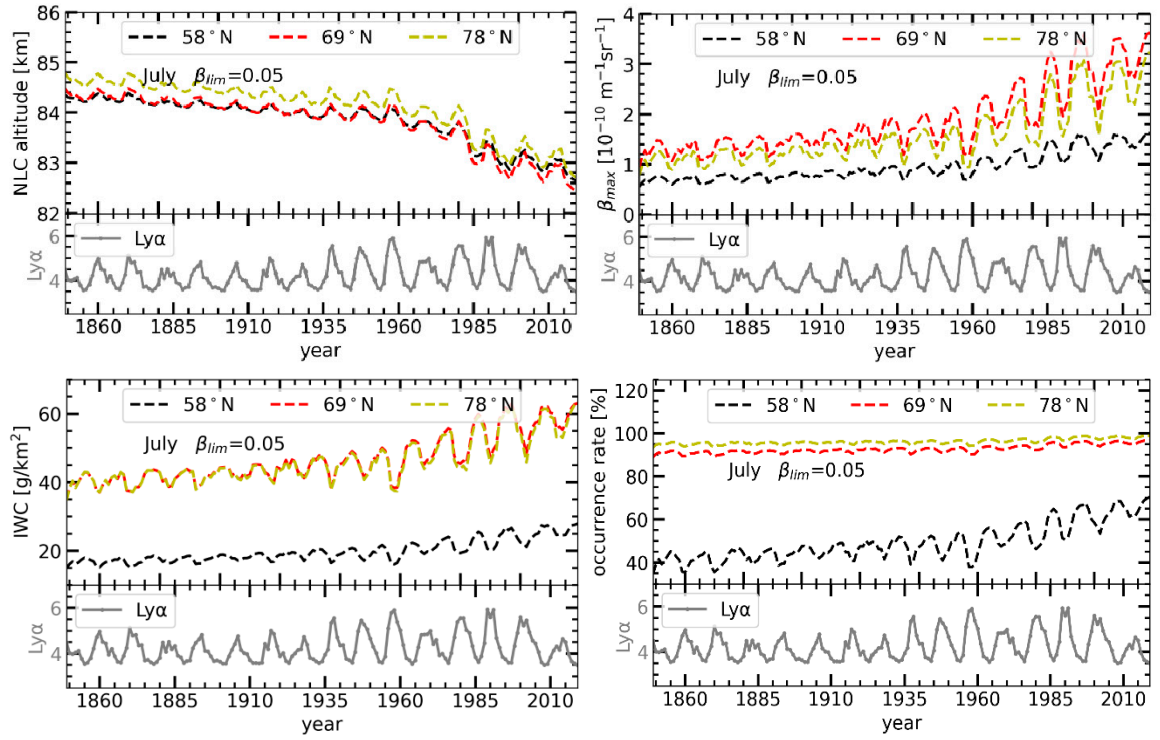

**Figure S2.** Time series of NLC properties (see y-axis label) for three different latitudes (58°N, 69°N, and 78°N) spanning the years 1849 to 2100.
